# Supplementary material
Source: PubMed Central journal article supplement (PMC5076758)
Supplement: DS_10.1177_0022034516657003_AppendixTable1.pdf [file DS_10.1177_0022034516657003_AppendixTable1.pdf]

## Association Studies and Direct DNA Sequencing Implicate Genetic Susceptibility Loci in the Etiology of Nonsyndromic Orofacial Clefts in Sub-Saharan African Populations

L.J.J. Gowans, W.L. Adeyemo, M. Eshete, P.A. Mossey, T. Busch, B. Aregbesola, P. Donkor, F.K.N. Arthur, S.A. Bello, A. Martinez, M. Li, E.A. Augustine-Akpan, W. Deressa, P. Twumasi, J. Olutayo, M. Deribew, P. Agbenorku, A.A. Oti, R. Braimah, G. Plange-Rhule, M. Gesses, S. Obiri-Yeboah, G.O. Oseni, P.B. Olaitan, L. Abdur-Rahman, F. Abate, T. Hailu, P. Gravem, M.O. Ogunlewe, C.J. Buxó, M.L. Marazita, A.A. Adeyemo, J.C. Murray, A. Butali

**Appendix Table 1:** List of 48 SNPs that were genotyped

| Chromosome | coordinate | SNP         | Probable gene/loci | Alleles/<br>Variation | NA18856<br>Genotype<br>in 1000<br>Genomes | NA18855<br>Genotype<br>in 1000<br>Genomes | Average<br>Call<br>Rate<br>(%) | Reference<br>study        | Study<br>population  |
|------------|------------|-------------|--------------------|-----------------------|-------------------------------------------|-------------------------------------------|--------------------------------|---------------------------|----------------------|
| 1          | 11854476   | rs1801131   | <i>MTHFR</i>       | T>G                   | T/T                                       | T/T                                       | 99.4                           | Boyles et al.2008         | Europeans            |
| 1          | 11856378   | rs1801133   | <i>MTHFR</i>       | G>A                   | G/A                                       | G/G                                       | 99.7                           | Boyles et al.2008         | Europeans            |
| 1          | 18956458   | rs766325    | <i>PAX7</i>        | A>G                   | A/A                                       | A/A                                       | 99.6                           | Beaty et al. 2010         | Europeans and Asians |
| 1          | 18979874   | rs742071    | <i>PAX7</i>        | G>T                   | T/G                                       | G/G                                       | 99.4                           | Beaty et al. 2010         | Europeans and Asians |
| 1          | 94553438   | rs560426    | <i>ABCA4</i>       | T>C                   | C/T                                       | T/C                                       | 99.5                           | Beaty et al. 2010         | Europeans and Asians |
| 1          | 94570016   | rs481931    | <i>ABCA4</i>       | G>T                   | G/G                                       | No data                                   | 99.5                           | Beaty et al. 2010         | Europeans and Asians |
| 1          | 94575056   | rs4147811   | <i>ABCA4</i>       | C>T                   | C/C                                       | No data                                   | 99.3                           | Beaty et al. 2010         | Europeans and Asians |
| 1          | 94650805   | rs138751793 | <i>ARHGAP29</i>    | T>C                   | T/T                                       | No data                                   | 99.3                           | Present Study             | Africans             |
| 1          | 108699730  | rs6677101   | <i>SLC25A24</i>    | T>G                   | G/T                                       | G/G                                       | 99.1                           | Butler et al. 2015        | Europeans            |
| 1          | 209977111  | rs861020    | <i>IRF6</i>        | G>A                   | G/G                                       | G/G                                       | 99.5                           | Rojas-Martinez et al.2010 | Europeans            |
| 1          | 209979529  | rs34743335  | <i>IRF6</i>        | A>T                   | A/A                                       | No data                                   | 97.9                           | Pegelow et al. 2008       | Europeans            |
| 1          | 209989270  | rs642961    | <i>IRF6</i>        | G>A                   | G/G                                       | G/G                                       | 99.5                           | Rahimov et al. 2008       | Europeans and Asians |

|    |           |             |                 |     |     |         |      |                           |                                 |
|----|-----------|-------------|-----------------|-----|-----|---------|------|---------------------------|---------------------------------|
| 1  | 210174417 | rs11119388  | <i>SYT14</i>    | A>G | A/A | A/A     | 99.6 | Leslie et al. 2014        | Europeans and Asians            |
| 2  | 43540125  | rs7590268   | <i>THADA</i>    | T>G | T/T | T/T     | 99.5 | Mangold et al. 2010       | Europeans                       |
| 2  | 71674476  | rs4332945   | <i>DYSF</i>     | T>G | T/T | T/T     | 99.3 | Brayton et al. 2009       | Mouse screen                    |
| 2  | 71780215  | rs2303596   | <i>DYSF</i>     | C>T | C/T | C/C     | 99.2 | Brayton et al. 2009       | Mouse screen                    |
| 2  | 71866842  | rs227782    | <i>DYSF</i>     | A>G | A/G | A/G     | 99.3 | Brayton et al. 2009       | Mouse screen                    |
| 4  | 4865146   | rs12532     | <i>MSX1</i>     | A>G | G/A | A/G     | 99.4 | Suzuki et al. 2004        | Asians                          |
| 4  | 4864991   | rs115200552 | <i>MSX1</i>     | G>C | G/G | No data | 99.5 | Present study             | Africans                        |
| 6  | 93506409  | rs2674394   | Gene Desert     | A>C | C/C | C/C     | 99.4 | Ludwig et al. 2012        | Europeans and Asians            |
| 6  | 158885758 | rs651333    | <i>TULP4</i>    | C>T | C/T | T/T     | 99.3 | Ludwig et al. 2012        | Europeans and Asians            |
| 8  | 27389542  | rs6558002   | <i>EPHX2</i>    | C>T | C/C | C/C     | 99.1 | Ludwig et al. 2012        | Europeans and Asians            |
| 8  | 129946154 | rs987525    | 8q24            | A>C | A/A | C/C     | 99.4 | Birnbaum et al. 2009      | Europeans                       |
| 9  | 100612270 | rs894673    | <i>FOXE1</i>    | A>T | T/T | T/T     | 99.3 | Moreno et al. 2009        | Europeans, Asians and Hispanics |
| 9  | 100614140 | rs3758249   | <i>FOXE1</i>    | T>C | C/C | C/C     | 99.4 | Moreno et al. 2009        | Europeans, Asians and Hispanics |
| 10 | 118827560 | rs7078160   | <i>VAX1</i>     | G>A | A/G | A/G     | 99.2 | Beaty et al. 2010         | Europeans and Asians            |
| 10 | 118834991 | rs4752028   | <i>VAX1</i>     | T>C | C/C | C/T     | 99.6 | Beaty et al. 2010         | Europeans and Asians            |
| 12 | 43819298  | rs10785430  | <i>ADAMTS20</i> | A>G | A/A | A/A     | 99.5 | Wolf et al. 2015          | Hispanics                       |
| 13 | 80668874  | rs9574565   | <i>SPRY2</i>    | T>C | C/T | T/T     | 99.4 | Ludwig et al. 2012        | Europeans and Asians            |
| 13 | 80692811  | rs8001641   | <i>SPRY2</i>    | G>A | A/G | G/G     | 99.5 | Ludwig et al. 2012        | Europeans and Asians            |
| 13 | 92003297  | rs375489721 | <i>MIR17HG</i>  | T>C | T/T | No data | 99.1 | Amendt et al. unpublished | Mouse screen                    |

|    |          |             |                 |     |     |         |      |                           |                      |
|----|----------|-------------|-----------------|-----|-----|---------|------|---------------------------|----------------------|
| 13 | 92003356 | rs185831554 | <i>MIR17HG</i>  | T>G | T/T | No data | 99.3 | Amendt et al. unpublished | Mouse screen         |
| 14 | 54417522 | rs17563     | <i>BMP4</i>     | A>G | A/A | G/A     | 99.5 | Chen et al. 2008          | Asians               |
| 15 | 33050423 | rs1258763   | <i>GREM1</i>    | C>T | C/C | C/C     | 99.3 | Ludwig et al. 2012        | Europeans and Asians |
| 16 | 3980445  | rs8049367   | <i>ADCY9</i>    | C>T | C/T | C/T     | 99.4 | Sun et al. 2015           | Asians               |
| 16 | 68771034 | rs16260     | <i>CDH1</i>     | C>A | C/A | A/C     | 99.2 | Song et al. 2011          | Asians               |
| 16 | 68790394 | rs11642413  | <i>CDH1</i>     | G>A | G/G | A/G     | 99.5 | Song et al. 2011          | Asians               |
| 16 | 84872051 | rs1546124   | <i>CRISPLD2</i> | C>G | C/C | C/G     | 99.5 | Chiquet et al. 2007       | Hispanics            |
| 16 | 84941329 | rs4783099   | <i>CRISPLD2</i> | C>T | C/T | C/C     | 99.3 | Chiquet et al. 2007       | Hispanics            |
| 17 | 8956285  | rs8069536   | <i>NTN1</i>     | G>T | G/G | G/T     | 99.4 | Beaty et al. 2010         | Europeans and Asians |
| 17 | 8965551  | rs8081823   | <i>NTN1</i>     | G>A | A/G | G/G     | 99.4 | Beaty et al. 2010         | Europeans and Asians |
| 17 | 54615617 | rs17760296  | <i>NOG1</i>     | T>G | T/T | T/T     | 99.5 | Mangold et al. 2010       | Europeans            |
| 17 | 54773238 | rs227731    | <i>NOG1</i>     | G>T | T/G | T/G     | 99.3 | Mangold et al. 2010       | Europeans            |
| 17 | 63528123 | rs7224837   | <i>AXIN2</i>    | A>G | A/G | A/A     | 99.3 | Letra et al. 2012         | Europeans and Asians |
| 17 | 63549488 | rs3923086   | <i>AXIN2</i>    | A>C | A/A | A/A     | 99.7 | Letra et al. 2012         | Europeans and Asians |
| 20 | 39268516 | rs17820943  | <i>MAFB</i>     | C>T | T/C | C/C     | 99.6 | Beaty et al. 2010         | Europeans and Asians |
| 20 | 39269074 | rs13041247  | <i>MAFB</i>     | T>C | C/T | T/T     | 99.5 | Beaty et al. 2010         | Europeans and Asians |
| 20 | 39270816 | rs11696257  | <i>MAFB</i>     | C>T | T/C | C/C     | 99.3 | Beaty et al. 2010         | Europeans and Asians |

Note: Except the studies designated as “present study” and Moreno et al. 2009, these loci were largely associated with NSCL/P in the study populations.
