# Supplementary material
Source: PubMed Central journal article supplement (PMC5076758)
Supplement: DS_10.1177_0022034516657003_AppendixTable2.pdf [file DS_10.1177_0022034516657003_AppendixTable2.pdf]

Association Studies and Direct DNA Sequencing Implicate Genetic Susceptibility Loci in the Etiology of Nonsyndromic Orofacial Clefts in Sub-Saharan African Populations

L.J.J. Gowans, W.L. Adeyemo, M. Eshete, P.A. Mossey, T. Busch, B. Aregbesola, P. Donkor, F.K.N. Arthur, S.A. Bello, A. Martinez, M. Li, E.A. Augustine-Akpan, W. Deressa, P. Twumasi, J. Olutayo, M. Deribew, P. Agbenorku, A.A. Oti, R. Braimah, G. Plange-Rhule, M. Gesses, S. Obiri-Yeboah, G.O. Oseni, P.B. Olaitan, L. Abdur-Rahman, F. Abate, T. Hailu, P. Gravem, M.O. Ogunlewe, C.J. Buxó, M.L. Marazita, A.A. Adeyemo, J.C. Murray, A. Butali

Appendix Table 2: Case-control analyses for Ethiopia

| Part A: Case-control analyses for NSCL/P and NSCPO for Ethiopia |                    |                             |             |                    |                         |             |                  |
|-----------------------------------------------------------------|--------------------|-----------------------------|-------------|--------------------|-------------------------|-------------|------------------|
| SNP                                                             | Probable gene/loci | NSCL/P                      |             |                    | NSCPO                   |             |                  |
|                                                                 |                    | <i>p</i>                    | OR          | 95% CI             | <i>p</i>                | OR          | 95% CI           |
| rs1801131                                                       | <i>MTHFR</i>       | 0.37                        | 1.10        | 0.89 - 1.36        | 0.88                    | 0.95        | 0.49 - 1.85      |
| rs1801133                                                       | <i>MTHFR</i>       | 0.85                        | 0.97        | 0.71 - 1.34        | 0.83                    | 0.89        | 0.31 - 2.54      |
| rs766325                                                        | <i>PAX7</i>        | 0.39                        | 0.90        | 0.71 - 1.14        | 0.86                    | 0.94        | 0.46 - 1.92      |
| rs742071                                                        | <i>PAX7</i>        | <b>5.57E-03<sup>a</sup></b> | <b>1.33</b> | <b>1.09 - 1.63</b> | 0.53                    | 0.82        | 0.44 - 1.53      |
| rs560426                                                        | <i>ABCA4</i>       | 0.95                        | 0.99        | 0.81 - 1.22        | 0.23                    | 1.46        | 0.79 - 2.71      |
| rs481931                                                        | <i>ABCA4</i>       | 0.75                        | 0.95        | 0.68 - 1.32        | <b>0.03<sup>a</sup></b> | <b>0.00</b> | <b>0.00 - NA</b> |
| rs4147811                                                       | <i>ABCA4</i>       | 0.69                        | 0.94        | 0.67 - 1.30        | <b>0.03<sup>a</sup></b> | <b>0.00</b> | <b>0.00 - NA</b> |
| rs138751793                                                     | <i>ARHGAP29</i>    | 0.62                        | 0.59        | 0.07 - 4.88        | 0.05                    | 6.42        | 0.73 - 56.15     |
| rs6677101                                                       | <i>SLC25A24</i>    | 0.30                        | 0.89        | 0.72 - 1.11        | 0.52                    | 1.23        | 0.66 - 2.29      |
| rs861020                                                        | <i>IRF6</i>        | 0.11                        | 1.21        | 0.96 - 1.52        | 0.13                    | 1.66        | 0.86 - 3.19      |
| rs34743335                                                      | <i>IRF6</i>        | 0.27                        | 0.78        | 0.51 - 1.21        | 0.52                    | 0.63        | 0.15 - 2.63      |
| rs642961                                                        | <i>IRF6</i>        | <b>0.02<sup>a</sup></b>     | <b>1.44</b> | <b>1.07 - 1.94</b> | 0.22                    | 1.68        | 0.73 - 3.84      |
| rs7590268                                                       | <i>THADA</i>       | 0.47                        | 0.92        | 0.73 - 1.16        | 0.70                    | 1.14        | 0.58 - 2.26      |
| rs4332945                                                       | <i>DYSF</i>        | 0.45                        | 0.92        | 0.74 - 1.14        | 0.77                    | 0.91        | 0.47 - 1.74      |
| rs2303596                                                       | <i>DYSF</i>        | <b>2.31E-03<sup>a</sup></b> | <b>0.69</b> | <b>0.54 - 0.87</b> | 0.10                    | 0.51        | 0.22 - 1.15      |
| rs227782                                                        | <i>DYSF</i>        | 0.10                        | 0.84        | 0.68 - 1.04        | 0.09                    | 0.55        | 0.27 - 1.10      |
| rs115200552                                                     | <i>MSX1</i>        | 0.40                        | 1.46        | 0.60 - 3.55        | 0.33                    | 2.66        | 0.34 - 20.96     |
| rs12532                                                         | <i>MSX1</i>        | 0.59                        | 1.06        | 0.86 - 1.31        | 0.22                    | 0.65        | 0.32 - 1.31      |
| rs2674394                                                       | Gene Desert        | 0.69                        | 0.95        | 0.74 - 1.23        | 0.73                    | 1.14        | 0.54 - 2.41      |
| rs651333                                                        | <i>TULP4</i>       | 0.52                        | 0.94        | 0.76 - 1.15        | 0.70                    | 0.88        | 0.47 - 1.67      |
| rs6558002                                                       | <i>EPHX2</i>       | 0.44                        | 0.92        | 0.76 - 1.13        | 0.44                    | 0.78        | 0.42 - 1.46      |
| rs987525                                                        | 8q24               | <b>7.82E-04<sup>a</sup></b> | <b>1.41</b> | <b>1.15 - 1.73</b> | 0.20                    | 1.50        | 0.81 - 2.78      |
| rs894673                                                        | <i>FOXE1</i>       | 0.47                        | 0.93        | 0.75 - 1.15        | 0.53                    | 1.23        | 0.65 - 2.29      |
| rs3758249                                                       | <i>FOXE1</i>       | 0.52                        | 0.93        | 0.75 - 1.16        | 0.52                    | 1.23        | 0.66 - 2.30      |
| rs7078160                                                       | <i>VAX1</i>        | 0.48                        | 1.10        | 0.85 - 1.41        | 0.56                    | 0.77        | 0.32 - 1.86      |

|            |          |                         |             |                    |                         |             |                    |
|------------|----------|-------------------------|-------------|--------------------|-------------------------|-------------|--------------------|
| rs4752028  | VAX1     | 0.90                    | 0.99        | 0.81 - 1.21        | 0.50                    | 0.80        | 0.42 - 1.52        |
| rs10785430 | ADAMTS20 | 0.83                    | 1.02        | 0.82 - 1.27        | 0.69                    | 1.14        | 0.59 - 2.19        |
| rs9574565  | SPRY2    | 0.87                    | 0.98        | 0.80 - 1.21        | 0.57                    | 0.83        | 0.43 - 1.59        |
| rs8001641  | SPRY2    | 0.21                    | 1.15        | 0.92 - 1.43        | 0.19                    | 0.59        | 0.27 - 1.30        |
| rs17563    | BMP4     | 0.91                    | 0.99        | 0.80 - 1.22        | 0.75                    | 0.90        | 0.46 - 1.75        |
| rs1258763  | GREM1    | 0.15                    | 0.86        | 0.70 - 1.06        | 0.79                    | 1.09        | 0.59 - 2.02        |
| rs8049367  | ADCY9    | 0.95                    | 0.99        | 0.80 - 1.23        | 0.36                    | 0.72        | 0.36 - 1.46        |
| rs16260    | CDH1     | 0.46                    | 1.11        | 0.84 - 1.48        | 0.66                    | 0.81        | 0.31 - 2.08        |
| rs11642413 | CDH1     | 0.39                    | 1.09        | 0.89 - 1.34        | 0.84                    | 1.07        | 0.58 - 1.97        |
| rs1546124  | CRISPLD2 | 0.44                    | 0.92        | 0.75 - 1.13        | 0.36                    | 0.74        | 0.39 - 1.41        |
| rs4783099  | CRISPLD2 | 0.87                    | 0.98        | 0.80 - 1.21        | 0.17                    | 0.62        | 0.32 - 1.23        |
| rs8069536  | NTN1     | 0.77                    | 1.04        | 0.81 - 1.32        | 0.15                    | 0.51        | 0.20 - 1.31        |
| rs8081823  | NTN1     | 0.20                    | 0.87        | 0.69 - 1.08        | <b>0.04<sup>a</sup></b> | <b>0.41</b> | <b>0.17 - 0.98</b> |
| rs17760296 | NOG1     | 0.48                    | 0.91        | 0.70 - 1.18        | 0.51                    | 1.28        | 0.62 - 2.63        |
| rs227731   | NOG1     | 0.45                    | 0.93        | 0.76 - 1.13        | 0.71                    | 0.89        | 0.48 - 1.65        |
| rs7224837  | AXIN2    | 0.53                    | 1.16        | 0.73 - 1.85        | 0.16                    | 0.00        | 0.00 - NA          |
| rs3923086  | AXIN2    | 0.42                    | 1.11        | 0.87 - 1.41        | 0.59                    | 1.22        | 0.59 - 2.52        |
| rs17820943 | MAFB     | 0.06                    | 0.81        | 0.65 - 1.01        | 0.27                    | 0.68        | 0.34 - 1.36        |
| rs13041247 | MAFB     | <b>0.04<sup>a</sup></b> | <b>0.80</b> | <b>0.64 - 0.99</b> | 0.51                    | 0.80        | 0.41 - 1.55        |
| rs11696257 | MAFB     | <b>0.04<sup>a</sup></b> | <b>0.79</b> | <b>0.64 - 0.99</b> | 0.51                    | 0.80        | 0.41 - 1.55        |

Part B: Case-control analyses for NSCL/P subphenotypes for Ethiopia

| SNP         | Probable gene/loci | NSCL                        |             |                    | NSCLP                       |             |                    |
|-------------|--------------------|-----------------------------|-------------|--------------------|-----------------------------|-------------|--------------------|
|             |                    | <i>p</i>                    | OR          | 95% CI             | <i>p</i>                    | OR          | 95% CI             |
| rs1801131   | MTHFR              | 0.37                        | 1.15        | 0.85 - 1.57        | 0.57                        | 1.08        | 0.82 - 1.42        |
| rs1801133   | MTHFR              | 0.42                        | 0.81        | 0.49 - 1.34        | 0.58                        | 1.12        | 0.75 - 1.66        |
| rs766325    | PAX7               | 0.68                        | 0.93        | 0.66 - 1.31        | 0.56                        | 0.91        | 0.68 - .123        |
| rs742071    | PAX7               | <b>7.74E-03<sup>a</sup></b> | <b>1.49</b> | <b>1.11 - 2.00</b> | 0.06                        | 1.28        | 0.99 - 1.65        |
| rs560426    | ABCA4              | 0.42                        | 0.88        | 0.66 - 1.19        | 0.57                        | 1.08        | 0.83 - 1.40        |
| rs481931    | ABCA4              | 0.70                        | 0.91        | 0.56 - 1.49        | 0.91                        | 1.03        | 0.67 - 1.56        |
| rs4147811   | ABCA4              | 0.62                        | 0.88        | 0.54 - 1.44        | 0.96                        | 1.01        | 0.66 - 1.53        |
| rs138751793 | ARHGAP29           | 0.45                        | 0.00        | 0.00 - NA          | 0.94                        | 0.93        | 0.11 - 7.76        |
| rs6677101   | SLC25A24           | 0.93                        | 0.99        | 0.72 - 1.34        | 0.30                        | 0.87        | 0.66 - 1.14        |
| rs861020    | IRF6               | 0.07                        | 1.35        | 0.98 - 1.87        | 0.31                        | 1.17        | 0.87 - 1.57        |
| rs34743335  | IRF6               | 0.53                        | 0.82        | 0.44 - 1.53        | 0.26                        | 0.73        | 0.42 - 1.27        |
| rs642961    | IRF6               | 0.49                        | 1.18        | 0.74 - 1.86        | <b>9.11E-03<sup>a</sup></b> | <b>1.61</b> | <b>1.12 - 2.31</b> |
| rs7590268   | THADA              | 0.17                        | 0.78        | 0.54 - 1.11        | 0.98                        | 1.00        | 0.75 - 1.34        |
| rs4332945   | DYSF               | 0.14                        | 0.79        | 0.57 - 1.08        | 0.96                        | 1.01        | 0.77 - 1.32        |
| rs2303596   | DYSF               | <b>4.99E-03<sup>a</sup></b> | <b>0.59</b> | <b>0.41 - 0.86</b> | <b>0.03<sup>a</sup></b>     | <b>0.70</b> | <b>0.52 - 0.96</b> |
| rs227782    | DYSF               | 0.41                        | 0.88        | 0.65 - 1.19        | 0.17                        | 0.83        | 0.63 - 1.09        |
| rs115200552 | MSX1               | <b>0.04<sup>a</sup></b>     | <b>2.81</b> | <b>0.99 - 7.97</b> | 0.69                        | 0.74        | 0.17 - 3.26        |
| rs12532     | MSX1               | 0.82                        | 1.04        | 0.76 - 1.41        | 0.58                        | 1.08        | 0.83 - 1.41        |

|            |                 |                             |             |                    |                             |             |                    |
|------------|-----------------|-----------------------------|-------------|--------------------|-----------------------------|-------------|--------------------|
| rs2674394  | Gene<br>Desert  | 0.70                        | 1.07        | 0.75 - 1.54        | 0.60                        | 0.91        | 0.66 - 1.27        |
| rs651333   | <i>TULP4</i>    | 0.35                        | 0.86        | 0.64 - 1.17        | 0.79                        | 0.96        | 0.74 - 1.25        |
| rs6558002  | <i>EPHX2</i>    | 0.79                        | 0.96        | 0.72 - 1.29        | 0.35                        | 0.88        | 0.68 - 1.15        |
| rs987525   | 8q24            | <b>0.03<sup>a</sup></b>     | <b>1.38</b> | <b>1.03 - 1.85</b> | <b>1.07E-03<sup>a</sup></b> | <b>1.54</b> | <b>1.19 - 1.99</b> |
| rs894673   | <i>FOXE1</i>    | 0.17                        | 0.80        | 0.58 - 1.10        | 0.99                        | 1.00        | 0.77 - 1.31        |
| rs3758249  | <i>FOXE1</i>    | 0.12                        | 0.78        | 0.56 - 1.07        | 0.79                        | 1.04        | 0.79 - 1.36        |
| rs7078160  | <i>VAX1</i>     | 0.87                        | 0.97        | 0.66 - 1.43        | 0.20                        | 1.23        | 0.89 - 1.68        |
| rs4752028  | <i>VAX1</i>     | 0.85                        | 0.97        | 0.72 - 1.31        | 0.99                        | 1.00        | 0.77 - 1.30        |
| rs10785430 | <i>ADAMTS20</i> | 0.14                        | 1.26        | 0.93 - 1.72        | 0.36                        | 0.87        | 0.66 - 1.16        |
| rs9574565  | <i>SPRY2</i>    | <b>7.05E-03<sup>a</sup></b> | <b>1.50</b> | <b>1.11 - 2.01</b> | <b>0.02<sup>a</sup></b>     | <b>0.73</b> | <b>0.55 - 0.95</b> |
| rs8001641  | <i>SPRY2</i>    | 0.72                        | 0.94        | 0.68 - 1.31        | 0.09                        | 1.27        | 0.97 - 1.67        |
| rs17563    | <i>BMP4</i>     | 0.93                        | 0.99        | 0.72 - 1.35        | 0.91                        | 1.02        | 0.77 - 1.33        |
| rs1258763  | <i>GREM1</i>    | 0.44                        | 0.89        | 0.66 - 1.20        | 0.15                        | 0.82        | 0.63 - 1.07        |
| rs8049367  | <i>ADCY9</i>    | 0.69                        | 0.94        | 0.68 - 1.29        | 0.81                        | 1.03        | 0.79 - 1.36        |
| rs16260    | <i>CDH1</i>     | 0.83                        | 1.05        | 0.69 - 1.59        | 0.58                        | 1.11        | 0.77 - 1.59        |
| rs11642413 | <i>CDH1</i>     | 0.27                        | 1.18        | 0.88 - 1.58        | 0.66                        | 1.06        | 0.82 - 1.37        |
| rs1546124  | <i>CRISPLD2</i> | 0.47                        | 0.90        | 0.66 - 1.21        | 0.62                        | 0.94        | 0.72 - 1.21        |
| rs4783099  | <i>CRISPLD2</i> | 0.49                        | 0.90        | 0.66 - 1.22        | 0.72                        | 1.05        | 0.81 - 1.36        |
| rs8069536  | <i>NTN1</i>     | 0.65                        | 0.92        | 0.64 - 1.33        | 0.28                        | 1.18        | 0.87 - 1.59        |
| rs8081823  | <i>NTN1</i>     | 0.84                        | 0.97        | 0.70 - 1.33        | 0.30                        | 0.86        | 0.64 - 1.15        |
| rs17760296 | <i>NOG1</i>     | 0.42                        | 0.85        | 0.58 - 1.26        | 0.68                        | 0.93        | 0.67 - 1.30        |
| rs227731   | <i>NOG1</i>     | 0.19                        | 0.82        | 0.61 - 1.10        | 0.84                        | 0.97        | 0.75 - 1.26        |
| rs7224837  | <i>AXIN2</i>    | 0.61                        | 1.19        | 0.62 - 2.29        | 0.54                        | 1.20        | 0.67 - 2.18        |
| rs3923086  | <i>AXIN2</i>    | 0.79                        | 1.05        | 0.73 - 1.50        | 0.19                        | 1.22        | 0.90 - 1.66        |
| rs17820943 | <i>MAFB</i>     | <b>0.02<sup>a</sup></b>     | <b>0.68</b> | <b>0.48 - 0.95</b> | 0.24                        | 0.85        | 0.64 - 1.12        |
| rs13041247 | <i>MAFB</i>     | <b>0.02<sup>a</sup></b>     | <b>0.67</b> | <b>0.48 - 0.93</b> | 0.22                        | 0.84        | 0.64 - 1.11        |
| rs11696257 | <i>MAFB</i>     | <b>0.02<sup>a</sup></b>     | <b>0.67</b> | <b>0.48 - 0.93</b> | 0.19                        | 0.83        | 0.63 - 1.09        |

<sup>a</sup>Loci that reached nominal significance
