# Supplementary material
Source: PubMed Central journal article supplement (PMC5076758)
Supplement: DS_10.1177_0022034516657003_AppendixTable3.pdf [file DS_10.1177_0022034516657003_AppendixTable3.pdf]

Association Studies and Direct DNA Sequencing Implicate Genetic Susceptibility Loci in the Etiology of Nonsyndromic Orofacial Clefts in Sub-Saharan African Populations

L.J.J. Gowans, W.L. Adeyemo, M. Eshete, P.A. Mossey, T. Busch, B. Aregbesola, P. Donkor, F.K.N. Arthur, S.A. Bello, A. Martinez, M. Li, E.A. Augustine-Akpan, W. Deressa, P. Twumasi, J. Olutayo, M. Deribew, P. Agbenorku, A.A. Oti, R. Braimah, G. Plange-Rhule, M. Gesses, S. Obiri-Yeboah, G.O. Oseni, P.B. Olaitan, L. Abdur-Rahman, F. Abate, T. Hailu, P. Gravem, M.O. Ogunlewe, C.J. Buxó, M.L. Marazita, A.A. Adeyemo, J.C. Murray, A. Butali

Appendix Table 3: Case-control analyses for Ghana

| Part A: Case-control analyses for NSCL/P and NSCPO for Ghana |                    |                         |             |                    |          |      |             |
|--------------------------------------------------------------|--------------------|-------------------------|-------------|--------------------|----------|------|-------------|
| SNP                                                          | Probable gene/loci | NSCL/P                  |             |                    | NSCPO    |      |             |
|                                                              |                    | <i>p</i>                | OR          | 95% CI             | <i>p</i> | OR   | 95% CI      |
| rs1801131                                                    | <i>MTHFR</i>       | 0.82                    | 1.03        | 0.79 - 1.35        | 0.40     | 0.81 | 0.51 - 1.32 |
| rs1801133                                                    | <i>MTHFR</i>       | 0.94                    | 1.01        | 0.72 - 1.43        | 0.51     | 0.81 | 0.44 - 1.49 |
| rs766325                                                     | <i>PAX7</i>        | 0.82                    | 0.97        | 0.75 - 1.26        | 0.65     | 0.91 | 0.60 - 1.38 |
| rs742071                                                     | <i>PAX7</i>        | 0.84                    | 1.02        | 0.85 - 1.23        | 0.88     | 0.98 | 0.72 - 1.33 |
| rs560426                                                     | <i>ABCA4</i>       | <b>0.03<sup>a</sup></b> | <b>1.22</b> | <b>1.01 - 1.47</b> | 0.16     | 1.24 | 0.92 - 1.67 |
| rs481931                                                     | <i>ABCA4</i>       | 0.67                    | 1.07        | 0.78 - 1.49        | 0.47     | 0.81 | 0.46 - 1.43 |
| rs4147811                                                    | <i>ABCA4</i>       | 0.89                    | 1.02        | 0.74 - 1.42        | 0.64     | 0.88 | 0.50 - 1.52 |
| rs138751793                                                  | <i>ARHGAP29</i>    | 0.77                    | 1.10        | 0.57 - 2.12        | 0.68     | 0.77 | 0.23 - 2.63 |
| rs6677101                                                    | <i>SLC25A24</i>    | 0.33                    | 1.10        | 0.91 - 1.34        | 0.27     | 1.19 | 0.87 - 1.63 |
| rs861020                                                     | <i>IRF6</i>        | 0.88                    | 0.98        | 0.72 - 1.32        | 0.27     | 0.73 | 0.41 - 1.28 |
| rs34743335                                                   | <i>IRF6</i>        | 0.93                    | 1.04        | 0.43 - 2.50        | 0.52     | 0.52 | 0.07 - 4.07 |
| rs642961                                                     | <i>IRF6</i>        | 0.48                    | 0.89        | 0.63 - 1.24        | 0.13     | 0.60 | 0.30 - 1.17 |
| rs7590268                                                    | <i>THADA</i>       | 0.80                    | 1.03        | 0.82 - 1.30        | 0.26     | 0.79 | 0.52 - 1.20 |
| rs4332945                                                    | <i>DYSF</i>        | 0.87                    | 1.02        | 0.79 - 1.32        | 0.70     | 0.92 | 0.61 - 1.40 |
| rs2303596                                                    | <i>DYSF</i>        | 0.99                    | 1.00        | 0.80 - 1.25        | 0.05     | 1.40 | 1.00 - 1.98 |
| rs227782                                                     | <i>DYSF</i>        | 0.75                    | 1.03        | 0.85 - 1.25        | 0.30     | 1.17 | 0.87 - 1.59 |
| rs115200552                                                  | <i>MSX1</i>        | 0.24                    | 1.28        | 0.85 - 1.91        | 0.06     | 1.72 | 0.97 - 3.03 |
| rs12532                                                      | <i>MSX1</i>        | 0.33                    | 0.91        | 0.76 - 1.10        | 0.87     | 1.03 | 0.76 - 1.38 |
| rs2674394                                                    | Gene Desert        | 0.55                    | 1.08        | 0.84 - 1.38        | 0.75     | 1.07 | 0.71 - 1.60 |
| rs651333                                                     | <i>TULP4</i>       | 0.74                    | 0.97        | 0.79 - 1.18        | 0.14     | 1.27 | 0.93 - 1.73 |
| rs6558002                                                    | <i>EPHX2</i>       | 0.52                    | 1.08        | 0.86 - 1.35        | 0.67     | 0.92 | 0.62 - 1.36 |
| rs987525                                                     | 8q24               | 0.11                    | 0.85        | 0.70 - 1.04        | 0.80     | 0.96 | 0.70 - 1.31 |
| rs894673                                                     | <i>FOXE1</i>       | 0.24                    | 0.89        | 0.73 - 1.08        | 0.56     | 0.91 | 0.66 - 1.25 |
| rs3758249                                                    | <i>FOXE1</i>       | 0.30                    | 0.90        | 0.74 - 1.10        | 0.59     | 0.92 | 0.67 - 1.26 |
| rs7078160                                                    | <i>VAX1</i>        | <b>0.03<sup>a</sup></b> | <b>1.25</b> | <b>1.02 - 1.54</b> | 0.59     | 1.10 | 0.78 - 1.55 |
| rs4752028                                                    | <i>VAX1</i>        | 0.12                    | 0.86        | 0.72 - 1.04        | 0.54     | 0.91 | 0.67 - 1.23 |
| rs10785430                                                   | <i>ADAMTS20</i>    | 0.46                    | 0.93        | 0.75 - 1.14        | 0.20     | 1.23 | 0.89 - 1.70 |

|            |                 |      |      |             |      |      |             |
|------------|-----------------|------|------|-------------|------|------|-------------|
| rs9574565  | <i>SPRY2</i>    | 0.45 | 1.08 | 0.89 - 1.30 | 0.47 | 1.12 | 0.83 - 1.51 |
| rs8001641  | <i>SPRY2</i>    | 0.79 | 1.04 | 0.78 - 1.40 | 0.55 | 0.86 | 0.53 - 1.41 |
| rs17563    | <i>BMP4</i>     | 0.45 | 0.91 | 0.72 - 1.16 | 0.99 | 1.00 | 0.69 - 1.45 |
| rs1258763  | <i>GREM1</i>    | 0.63 | 1.05 | 0.87 - 1.26 | 0.65 | 0.93 | 0.69 - 1.26 |
| rs8049367  | <i>ADCY9</i>    | 0.34 | 1.10 | 0.90 - 1.34 | 0.48 | 0.89 | 0.64 - 1.23 |
| rs16260    | <i>CDH1</i>     | 0.84 | 1.03 | 0.78 - 1.37 | 0.46 | 0.84 | 0.52 - 1.35 |
| rs11642413 | <i>CDH1</i>     | 0.81 | 0.97 | 0.78 - 1.21 | 0.24 | 0.80 | 0.55 - 1.16 |
| rs1546124  | <i>CRISPLD2</i> | 0.92 | 1.01 | 0.80 - 1.28 | 0.44 | 1.15 | 0.80 - 1.65 |
| rs4783099  | <i>CRISPLD2</i> | 0.41 | 1.08 | 0.90 - 1.31 | 0.28 | 0.84 | 0.61 - 1.15 |
| rs8069536  | <i>NTN1</i>     | 0.70 | 1.04 | 0.86 - 1.27 | 0.88 | 0.98 | 0.71 - 1.34 |
| rs8081823  | <i>NTN1</i>     | 0.46 | 0.92 | 0.75 - 1.14 | 0.73 | 1.06 | 0.76 - 1.47 |
| rs17760296 | <i>NOG1</i>     | 0.90 | 1.05 | 0.48 - 2.28 | 0.07 | 2.66 | 0.90 - 7.87 |
| rs227731   | <i>NOG1</i>     | 0.43 | 1.10 | 0.87 - 1.38 | 0.25 | 1.23 | 0.86 - 1.75 |
| rs7224837  | <i>AXIN2</i>    | 0.80 | 1.04 | 0.75 - 1.44 | 0.49 | 0.81 | 0.44 - 1.48 |
| rs3923086  | <i>AXIN2</i>    | 0.36 | 1.99 | 0.44 - 8.92 | 0.33 | 0.00 | 0.00 - NA   |
| rs17820943 | <i>MAFB</i>     | 0.88 | 1.02 | 0.81 - 1.28 | 0.82 | 1.04 | 0.73 - 1.49 |
| rs13041247 | <i>MAFB</i>     | 0.70 | 1.05 | 0.83 - 1.32 | 0.58 | 1.11 | 0.77 - 1.59 |
| rs11696257 | <i>MAFB</i>     | 0.84 | 1.02 | 0.81 - 1.29 | 0.88 | 1.03 | 0.72 - 1.48 |

Part B: Case-control analyses for NSCL/P subphenotypes for Ghana

| SNP         | Probable gene/loci | NSCL     |      |             | NSCLP                   |             |                    |
|-------------|--------------------|----------|------|-------------|-------------------------|-------------|--------------------|
|             |                    | <i>p</i> | OR   | 95% CI      | <i>p</i>                | OR          | 95% CI             |
| rs1801131   | <i>MTHFR</i>       | 0.58     | 0.90 | 0.63 - 1.30 | 0.41                    | 1.17        | 0.81 - 1.68        |
| rs1801133   | <i>MTHFR</i>       | 0.91     | 1.03 | 0.64 - 1.64 | 0.92                    | 1.02        | 0.64 - 1.63        |
| rs766325    | <i>PAX7</i>        | 0.57     | 1.10 | 0.79 - 1.53 | 0.30                    | 0.82        | 0.57 - 1.19        |
| rs742071    | <i>PAX7</i>        | 0.83     | 0.97 | 0.76 - 1.25 | 0.48                    | 1.10        | 0.85 - 1.42        |
| rs560426    | <i>ABCA4</i>       | 0.38     | 1.12 | 0.87 - 1.42 | <b>0.01<sup>a</sup></b> | <b>1.39</b> | <b>1.08 - 1.80</b> |
| rs481931    | <i>ABCA4</i>       | 0.82     | 1.05 | 0.68 - 1.62 | 0.76                    | 1.07        | 0.69 - 1.67        |
| rs4147811   | <i>ABCA4</i>       | 0.57     | 0.88 | 0.55 - 1.39 | 0.47                    | 1.17        | 0.76 - 1.80        |
| rs138751793 | <i>ARHGAP29</i>    | 0.54     | 0.71 | 0.24 - 2.09 | 0.36                    | 1.43        | 0.66 - 3.09        |
| rs6677101   | <i>SLC25A24</i>    | 0.98     | 1.00 | 0.77 - 1.31 | 0.09                    | 1.26        | 0.97 - 1.65        |
| rs861020    | <i>IRF6</i>        | 0.73     | 1.07 | 0.73 - 1.57 | 0.62                    | 0.90        | 0.58 - 1.38        |
| rs34743335  | <i>IRF6</i>        | 0.89     | 1.08 | 0.35 - 3.30 | 0.87                    | 0.90        | 0.26 - 3.15        |
| rs642961    | <i>IRF6</i>        | 0.89     | 0.97 | 0.63 - 1.50 | 0.39                    | 0.81        | 0.50 - 1.32        |
| rs7590268   | <i>THADA</i>       | 0.86     | 0.97 | 0.71 - 1.33 | 0.25                    | 1.20        | 0.88 - 1.64        |
| rs4332945   | <i>DYSF</i>        | 0.88     | 1.03 | 0.73 - 1.43 | 0.82                    | 1.04        | 0.73 - 1.48        |
| rs2303596   | <i>DYSF</i>        | 0.46     | 1.12 | 0.83 - 1.50 | 0.69                    | 0.94        | 0.68 - 1.29        |
| rs227782    | <i>DYSF</i>        | 0.55     | 0.93 | 0.72 - 1.19 | 0.20                    | 1.18        | 0.91 - 1.53        |
| rs115200552 | <i>MSX1</i>        | 0.33     | 1.31 | 0.76 - 2.27 | 0.39                    | 1.27        | 0.73 - 2.18        |
| rs12532     | <i>MSX1</i>        | 0.68     | 0.95 | 0.74 - 1.21 | 0.16                    | 0.83        | 0.64 - 1.08        |
| rs2674394   | Gene Desert        | 0.08     | 1.32 | 0.97 - 1.80 | 0.46                    | 0.87        | 0.60 - 1.26        |
| rs651333    | <i>TULP4</i>       | 0.72     | 1.05 | 0.81 - 1.36 | 0.44                    | 0.90        | 0.68 - 1.18        |

|            |                 |                         |             |                   |      |      |             |
|------------|-----------------|-------------------------|-------------|-------------------|------|------|-------------|
| rs6558002  | <i>EPHX2</i>    | 0.78                    | 0.96        | 0.70 - 1.30       | 0.14 | 1.25 | 0.93 - 1.69 |
| rs987525   | 8q24            | 0.06                    | 0.78        | 0.60 - 1.02       | 0.56 | 0.92 | 0.70 - 1.21 |
| rs894673   | <i>FOXE1</i>    | 0.43                    | 0.90        | 0.70 - 1.17       | 0.31 | 0.87 | 0.66 - 1.14 |
| rs3758249  | <i>FOXE1</i>    | 0.46                    | 0.91        | 0.70 - 1.17       | 0.41 | 0.89 | 0.68 - 1.17 |
| rs7078160  | <i>VAX1</i>     | <b>0.04<sup>a</sup></b> | <b>1.32</b> | <b>1.02- 1.72</b> | 0.17 | 1.22 | 0.92 - 1.63 |
| rs4752028  | <i>VAX1</i>     | 0.11                    | 0.82        | 0.64 - 1.05       | 0.27 | 0.87 | 0.67 - 1.12 |
| rs10785430 | <i>ADAMTS20</i> | 0.48                    | 0.91        | 0.69 - 1.19       | 0.83 | 0.97 | 0.73 - 1.29 |
| rs9574565  | <i>SPRY2</i>    | 0.19                    | 1.18        | 0.92 - 1.50       | 0.70 | 0.95 | 0.73 - 1.24 |
| rs8001641  | <i>SPRY2</i>    | 0.65                    | 1.09        | 0.75 - 1.59       | 0.75 | 0.93 | 0.62 - 1.41 |
| rs17563    | <i>BMP4</i>     | 0.49                    | 0.89        | 0.65 - 1.23       | 0.61 | 0.92 | 0.66 - 1.28 |
| rs1258763  | <i>GREM1</i>    | 0.45                    | 1.10        | 0.86 - 1.40       | 0.65 | 1.06 | 0.82 - 1.37 |
| rs8049367  | <i>ADCY9</i>    | 0.56                    | 1.08        | 0.83 - 1.40       | 0.49 | 1.10 | 0.84 - 1.44 |
| rs16260    | <i>CDH1</i>     | 0.10                    | 0.70        | 0.46 - 1.07       | 0.12 | 1.33 | 0.93 - 1.91 |
| rs11642413 | <i>CDH1</i>     | 0.85                    | 0.97        | 0.73 - 1.30       | 1.00 | 1.00 | 0.74 - 1.35 |
| rs1546124  | <i>CRISPLD2</i> | 0.49                    | 0.89        | 0.65 - 1.23       | 0.30 | 1.18 | 0.86 - 1.61 |
| rs4783099  | <i>CRISPLD2</i> | 0.78                    | 1.04        | 0.81 - 1.33       | 0.17 | 1.20 | 0.92 - 1.56 |
| rs8069536  | <i>NTN1</i>     | 0.66                    | 0.94        | 0.72 - 1.23       | 0.31 | 1.15 | 0.88 - 1.50 |
| rs8081823  | <i>NTN1</i>     | 0.80                    | 0.96        | 0.73 - 1.27       | 0.33 | 0.86 | 0.64 - 1.16 |
| rs17760296 | <i>NOG1</i>     | 0.71                    | 1.21        | 0.44 - 3.32       | 0.66 | 1.29 | 0.42 - 3.99 |
| rs227731   | <i>NOG1</i>     | 0.61                    | 1.08        | 0.80 - 1.46       | 0.53 | 1.11 | 0.81 - 1.52 |
| rs7224837  | <i>AXIN2</i>    | 0.62                    | 1.11        | 0.73 - 1.69       | 0.80 | 1.06 | 0.67 - 1.68 |
| rs3923086  | <i>AXIN2</i>    | 0.15                    | 2.86        | 0.64 - 12.83      | 0.40 | 0.00 | 0.00 - NA   |
| rs17820943 | <i>MAFB</i>     | 0.93                    | 1.01        | 0.75 - 1.36       | 0.72 | 0.94 | 0.68 - 1.30 |
| rs13041247 | <i>MAFB</i>     | 0.80                    | 1.04        | 0.77 - 1.40       | 0.99 | 1.00 | 0.72 - 1.38 |
| rs11696257 | <i>MAFB</i>     | 0.87                    | 1.02        | 0.76 - 1.38       | 0.76 | 0.95 | 0.69 - 1.31 |

<sup>a</sup>Loci that reached nominal significance
