# Supplementary material
Source: PubMed Central journal article supplement (PMC5076758)
Supplement: DS_10.1177_0022034516657003_AppendixTable4.pdf [file DS_10.1177_0022034516657003_AppendixTable4.pdf]

Association Studies and Direct DNA Sequencing Implicate Genetic Susceptibility Loci in the Etiology of Nonsyndromic Orofacial Clefts in Sub-Saharan African Populations

L.J.J. Gowans, W.L. Adeyemo, M. Eshete, P.A. Mossey, T. Busch, B. Aregbesola, P. Donkor, F.K.N. Arthur, S.A. Bello, A. Martinez, M. Li, E.A. Augustine-Akpan, W. Deressa, P. Twumasi, J. Olutayo, M. Deribew, P. Agbenorku, A.A. Oti, R. Braimah, G. Plange-Rhule, M. Gesses, S. Obiri-Yeboah, G.O. Oseni, P.B. Olaitan, L. Abdur-Rahman, F. Abate, T. Hailu, P. Gravem, M.O. Ogunlewe, C.J. Buxó, M.L. Marazita, A.A. Adeyemo, J.C. Murray, A. Butali

Appendix Table 4: Case-control analyses for Nigeria

| Part A: Case-control analyses for NSCL/P and NSCPO for Nigeria |                    |                             |             |                    |          |      |               |
|----------------------------------------------------------------|--------------------|-----------------------------|-------------|--------------------|----------|------|---------------|
| SNP                                                            | Probable gene/loci | NSCL/P                      |             |                    | NSCPO    |      |               |
|                                                                |                    | <i>p</i>                    | OR          | 95% CI             | <i>p</i> | OR   | 95% CI        |
| rs1801131                                                      | <i>MTHFR</i>       | 0.42                        | 1.17        | 0.80 - 1.70        | 0.28     | 0.62 | 0.26 - 1.47   |
| rs1801133                                                      | <i>MTHFR</i>       | 0.07                        | 1.53        | 0.96 - 2.45        | 0.73     | 0.83 | 0.29 - 2.37   |
| rs766325                                                       | <i>PAX7</i>        | 0.56                        | 0.90        | 0.64 - 1.27        | 0.07     | 0.50 | 0.27 - 1.07   |
| rs742071                                                       | <i>PAX7</i>        | 0.05                        | 1.30        | 1.00 - 1.67        | 0.93     | 1.02 | 0.65 - 1.62   |
| rs560426                                                       | <i>ABCA4</i>       | 0.77                        | 0.96        | 0.75 - 1.24        | 0.94     | 0.98 | 0.63 - 1.55   |
| rs481931                                                       | <i>ABCA4</i>       | 0.12                        | 1.40        | 0.92 - 2.12        | 0.89     | 0.94 | 0.39 - 2.25   |
| rs4147811                                                      | <i>ABCA4</i>       | <b>7.48E-03<sup>a</sup></b> | <b>1.72</b> | <b>1.15 - 2.56</b> | 0.44     | 1.34 | 0.64 - 2.80   |
| rs138751793                                                    | <i>ARHGAP29</i>    | 0.12                        | 1.69        | 0.86 - 3.32        | 0.57     | 1.43 | 0.41 - 4.93   |
| rs6677101                                                      | <i>SLC25A24</i>    | 0.66                        | 0.94        | 0.72 - 1.23        | 0.08     | 0.63 | 0.38 - 1.06   |
| rs861020                                                       | <i>IRF6</i>        | 0.90                        | 1.02        | 0.70 - 1.49        | 0.78     | 0.91 | 0.47 - 1.77   |
| rs34743335                                                     | <i>IRF6</i>        | 0.28                        | 2.16        | 0.51 - 9.08        | 0.06     | 9.33 | 0.58 - 150.60 |
| rs642961                                                       | <i>IRF6</i>        | 0.60                        | 0.89        | 0.57 - 1.38        | 0.67     | 0.85 | 0.39 - 1.82   |
| rs7590268                                                      | <i>THADA</i>       | 0.89                        | 0.98        | 0.71 - 1.35        | 0.66     | 0.87 | 0.48 - 1.60   |
| rs4332945                                                      | <i>DYSF</i>        | 0.51                        | 1.13        | 0.79 - 1.60        | 0.55     | 1.21 | 0.66 - 2.22   |
| rs2303596                                                      | <i>DYSF</i>        | 0.14                        | 1.28        | 0.92 - 1.77        | 0.21     | 0.63 | 0.31 - 1.30   |
| rs227782                                                       | <i>DYSF</i>        | 0.79                        | 0.97        | 0.74 - 1.25        | 0.29     | 0.77 | 0.48 - 1.24   |
| rs115200552                                                    | <i>MSX1</i>        | 0.23                        | 0.59        | 0.24 - 1.41        | 0.15     | 1.93 | 0.78 - 4.79   |
| rs12532                                                        | <i>MSX1</i>        | 0.49                        | 0.91        | 0.71 - 1.18        | 0.15     | 0.72 | 0.45 - 1.13   |
| rs2674394                                                      | Gene Desert        | 0.81                        | 1.04        | 0.74 - 1.47        | 0.97     | 1.01 | 0.54 - 1.89   |
| rs651333                                                       | <i>TULP4</i>       | 0.51                        | 0.91        | 0.68 - 1.21        | 0.12     | 1.45 | 0.91 - 2.32   |
| rs6558002                                                      | <i>EPHX2</i>       | 0.92                        | 0.98        | 0.71 - 1.36        | 0.80     | 1.08 | 0.62 - 1.86   |
| rs987525                                                       | 8q24               | 0.74                        | 0.96        | 0.73 - 1.25        | 0.31     | 0.78 | 0.49 - 1.26   |
| rs894673                                                       | <i>FOXE1</i>       | 0.49                        | 1.10        | 0.84 - 1.46        | 0.73     | 1.09 | 0.67 - 1.79   |
| rs3758249                                                      | <i>FOXE1</i>       | 0.40                        | 1.13        | 0.85 - 1.18        | 0.74     | 1.09 | 0.66 - 1.78   |
| rs7078160                                                      | <i>VAX1</i>        | 0.63                        | 1.07        | 0.80 - 1.44        | 1.00     | 1.00 | 0.59 - 1.70   |
| rs4752028                                                      | <i>VAX1</i>        | 0.68                        | 1.06        | 0.82 - 1.36        | 0.98     | 0.99 | 0.63 - 1.57   |

|            |                 |      |      |             |                         |             |                    |
|------------|-----------------|------|------|-------------|-------------------------|-------------|--------------------|
| rs10785430 | <i>ADAMTS20</i> | 0.77 | 1.04 | 0.79 - 1.36 | 0.67                    | 0.90        | 0.55 - 1.47        |
| rs9574565  | <i>SPRY2</i>    | 0.57 | 0.92 | 0.70 - 1.21 | 0.77                    | 0.93        | 0.58 - 1.49        |
| rs8001641  | <i>SPRY2</i>    | 0.80 | 0.94 | 0.58 - 1.52 | 0.75                    | 1.13        | 0.52 - 2.45        |
| rs17563    | <i>BMP4</i>     | 0.29 | 1.21 | 0.85 - 1.72 | 0.38                    | 1.31        | 0.72 - 2.37        |
| rs1258763  | <i>GREM1</i>    | 0.46 | 1.10 | 0.85 - 1.42 | 0.84                    | 0.95        | 0.61 - 1.50        |
| rs8049367  | <i>ADCY9</i>    | 0.09 | 1.26 | 0.97 - 1.64 | 0.11                    | 0.66        | 0.39 - 1.11        |
| rs16260    | <i>CDH1</i>     | 0.78 | 1.06 | 0.71 - 1.58 | 0.53                    | 0.78        | 0.37 - 1.68        |
| rs11642413 | <i>CDH1</i>     | 0.62 | 0.93 | 0.69 - 1.25 | 0.33                    | 0.75        | 0.42 - 1.34        |
| rs1546124  | <i>CRISPLD2</i> | 0.62 | 0.93 | 0.68 - 1.26 | 0.51                    | 0.83        | 0.48 - 1.44        |
| rs4783099  | <i>CRISPLD2</i> | 0.98 | 1.00 | 0.77 - 1.31 | <b>0.04<sup>a</sup></b> | <b>0.58</b> | <b>0.34 - 0.98</b> |
| rs8069536  | <i>NTN1</i>     | 0.06 | 1.28 | 0.99 - 1.66 | 0.62                    | 1.12        | 0.71 - 1.78        |
| rs8081823  | <i>NTN1</i>     | 0.30 | 0.85 | 0.63 - 1.15 | 0.67                    | 0.89        | 0.53 - 1.51        |
| rs17760296 | <i>NOG1</i>     | 0.29 | 1.45 | 0.73 - 2.88 | 0.11                    | 2.21        | 0.81 - 6.02        |
| rs227731   | <i>NOG1</i>     | 0.83 | 0.97 | 0.70 - 1.34 | 0.56                    | 1.17        | 0.68 - 2.02        |
| rs7224837  | <i>AXIN2</i>    | 0.71 | 0.92 | 0.60 - 1.42 | 0.67                    | 1.16        | 0.58 - 2.35        |
| rs3923086  | <i>AXIN2</i>    | 0.35 | 0.00 | 0.00 - NA   | 0.56                    | 0.00        | 0.00 - NA          |
| rs17820943 | <i>MAFB</i>     | 0.81 | 1.04 | 0.76 - 1.42 | 0.21                    | 1.38        | 0.83 - 2.30        |
| rs13041247 | <i>MAFB</i>     | 0.81 | 1.04 | 0.76 - 1.42 | 0.22                    | 1.38        | 0.83 - 2.30        |
| rs11696257 | <i>MAFB</i>     | 0.78 | 1.05 | 0.77 - 1.43 | 0.21                    | 1.38        | 0.83 - 2.31        |

Part B: Case-control analyses for NSCL/P subphenotypes for Nigeria

| SNP         | Probable gene/loci | NSCL                    |             |                    | NSCLP                       |             |                    |
|-------------|--------------------|-------------------------|-------------|--------------------|-----------------------------|-------------|--------------------|
|             |                    | <i>p</i>                | OR          | 95% CI             | <i>p</i>                    | OR          | 95% CI             |
| rs1801131   | <i>MTHFR</i>       | 0.61                    | 1.14        | 0.68 - 1.91        | 0.36                        | 1.27        | 0.76 - 2.10        |
| rs1801133   | <i>MTHFR</i>       | 0.17                    | 1.56        | 0.82 - 2.95        | 0.15                        | 1.59        | 0.84 - 3.00        |
| rs766325    | <i>PAX7</i>        | 0.87                    | 0.96        | 0.61 - 1.52        | 0.38                        | 0.80        | 0.49 - 1.31        |
| rs742071    | <i>PAX7</i>        | <b>0.02<sup>a</sup></b> | <b>1.48</b> | <b>1.05 - 2.08</b> | 0.27                        | 1.22        | 0.86 - 1.74        |
| rs560426    | <i>ABCA4</i>       | 0.98                    | 1.01        | 0.71 - 1.41        | 0.63                        | 1.09        | 0.77 - 1.56        |
| rs481931    | <i>ABCA4</i>       | 0.66                    | 0.86        | 0.43 - 1.71        | <b>2.87E-03<sup>a</sup></b> | <b>2.10</b> | <b>1.28 - 3.46</b> |
| rs4147811   | <i>ABCA4</i>       | <b>0.02<sup>a</sup></b> | <b>1.88</b> | <b>1.11 - 3.18</b> | 0.05                        | 1.72        | 1.00 - 2.95        |
| rs138751793 | <i>ARHGAP29</i>    | <b>0.04<sup>a</sup></b> | <b>2.30</b> | <b>1.04 - 5.09</b> | 0.80                        | 1.15        | 0.39 - 3.39        |
| rs6677101   | <i>SLC25A24</i>    | 0.88                    | 1.03        | 0.72 - 1.47        | 0.35                        | 0.83        | 0.57 - 1.22        |
| rs861020    | <i>IRF6</i>        | 0.59                    | 0.87        | 0.52 - 1.46        | 0.87                        | 1.04        | 0.63 - 1.74        |
| rs34743335  | <i>IRF6</i>        | 0.38                    | 2.79        | 0.25 - 30.91       | 0.16                        | 3.20        | 0.58 - 17.63       |
| rs642961    | <i>IRF6</i>        | 0.20                    | 0.66        | 0.34 - 1.26        | 0.97                        | 1.01        | 0.57 - 1.80        |
| rs7590268   | <i>THADA</i>       | 0.94                    | 1.02        | 0.67 - 1.55        | 0.87                        | 0.96        | 0.61 - 1.52        |
| rs4332945   | <i>DYSF</i>        | 0.63                    | 1.13        | 0.70 - 1.81        | 0.62                        | 1.13        | 0.70 - 1.84        |
| rs2303596   | <i>DYSF</i>        | 0.89                    | 0.97        | 0.60 - 1.57        | 0.05                        | 1.51        | 0.99 - 2.31        |
| rs227782    | <i>DYSF</i>        | 0.88                    | 1.03        | 0.73 - 1.45        | 0.76                        | 0.95        | 0.66 - 2.56        |
| rs115200552 | <i>MSX1</i>        | 0.16                    | 0.37        | 0.09 - 1.56        | 0.68                        | 0.80        | 0.28 - 2.30        |
| rs12532     | <i>MSX1</i>        | 0.25                    | 0.82        | 0.58 - 1.15        | 0.82                        | 0.96        | 0.67 - 1.37        |
| rs2674394   | Gene Desert        | 0.57                    | 1.14        | 0.73 - 1.80        | 0.97                        | 0.99        | 0.62 - 1.59        |

|            |                 |      |      |             |      |      |             |
|------------|-----------------|------|------|-------------|------|------|-------------|
| rs651333   | <i>TULP4</i>    | 0.40 | 0.85 | 0.58 - 1.25 | 0.93 | 0.98 | 0.67 - 1.45 |
| rs6558002  | <i>EPHX2</i>    | 0.53 | 0.87 | 0.55 - 1.36 | 0.86 | 1.04 | 0.67 - 1.63 |
| rs987525   | 8q24            | 0.44 | 0.87 | 0.61 - 1.24 | 0.81 | 0.96 | 0.66 - 1.38 |
| rs894673   | <i>FOXE1</i>    | 0.15 | 1.30 | 0.91 - 1.87 | 0.78 | 0.94 | 0.63 - 1.41 |
| rs3758249  | <i>FOXE1</i>    | 0.14 | 1.31 | 0.91 - 1.87 | 0.89 | 0.97 | 0.65 - 1.44 |
| rs7078160  | <i>VAX1</i>     | 0.17 | 1.30 | 0.89 - 1.89 | 0.37 | 0.82 | 0.53 - 1.27 |
| rs4752028  | <i>VAX1</i>     | 0.42 | 1.15 | 0.82 - 1.62 | 0.96 | 1.01 | 0.71 - 1.44 |
| rs10785430 | <i>ADAMTS20</i> | 0.53 | 0.89 | 0.61 - 1.29 | 0.27 | 1.23 | 0.85 - 1.77 |
| rs9574565  | <i>SPRY2</i>    | 0.90 | 0.98 | 0.68 - 1.40 | 0.34 | 0.83 | 0.57 - 1.22 |
| rs8001641  | <i>SPRY2</i>    | 0.71 | 0.88 | 0.47 - 1.67 | 0.85 | 0.94 | 0.48 - 1.82 |
| rs17563    | <i>BMP4</i>     | 0.17 | 1.38 | 0.87 - 2.18 | 0.64 | 1.12 | 0.69 - 1.82 |
| rs1258763  | <i>GREM1</i>    | 0.64 | 1.09 | 0.77 - 1.53 | 0.31 | 1.20 | 0.84 - 1.71 |
| rs8049367  | <i>ADCY9</i>    | 0.09 | 1.36 | 0.96 - 1.93 | 0.45 | 1.15 | 0.80 - 1.66 |
| rs16260    | <i>CDH1</i>     | 0.75 | 1.09 | 0.65 - 1.82 | 0.85 | 0.94 | 0.53 - 1.68 |
| rs11642413 | <i>CDH1</i>     | 0.31 | 0.81 | 0.53 - 1.23 | 0.50 | 1.15 | 0.77 - 1.71 |
| rs1546124  | <i>CRISPLD2</i> | 0.49 | 0.87 | 0.57 - 1.31 | 0.82 | 0.95 | 0.62 - 1.45 |
| rs4783099  | <i>CRISPLD2</i> | 0.73 | 1.07 | 0.75 - 1.52 | 0.83 | 0.96 | 0.66 - 1.39 |
| rs8069536  | <i>NTN1</i>     | 0.19 | 1.26 | 0.89 - 1.78 | 0.12 | 1.33 | 0.93 - 1.92 |
| rs8081823  | <i>NTN1</i>     | 0.85 | 0.96 | 0.65 - 1.42 | 0.10 | 0.70 | 0.45 - 1.08 |
| rs17760296 | <i>NOG1</i>     | 0.19 | 1.71 | 0.76 - 3.86 | 0.80 | 1.15 | 0.39 - 3.40 |
| rs227731   | <i>NOG1</i>     | 0.31 | 0.79 | 0.50 - 1.25 | 0.44 | 1.18 | 0.77 - 1.82 |
| rs7224837  | <i>AXIN2</i>    | 0.97 | 1.01 | 0.58 - 1.78 | 0.61 | 0.85 | 0.46 - 1.57 |
| rs3923086  | <i>AXIN2</i>    | 0.46 | 0.00 | 0.00 - NA   | 0.48 | 0.00 | 0.00 - NA   |
| rs17820943 | <i>MAFB</i>     | 0.91 | 1.02 | 0.67 - 1.56 | 0.62 | 1.11 | 0.73 - 1.70 |
| rs13041247 | <i>MAFB</i>     | 0.94 | 1.02 | 0.67 - 1.54 | 0.61 | 1.12 | 0.73 - 1.70 |
| rs11696257 | <i>MAFB</i>     | 0.91 | 1.02 | 0.67 - 1.56 | 0.59 | 1.12 | 0.74 - 1.71 |

<sup>a</sup>Loci that reached nominal significance
