# Supplementary material
Source: PubMed Central journal article supplement (PMC5076758)
Supplement: DS_10.1177_0022034516657003_AppendixTable5.pdf [file DS_10.1177_0022034516657003_AppendixTable5.pdf]

Association Studies and Direct DNA Sequencing Implicate Genetic Susceptibility Loci in the Etiology of Nonsyndromic Orofacial Clefts in Sub-Saharan African Populations

L.J.J. Gowans, W.L. Adeyemo, M. Eshete, P.A. Mossey, T. Busch, B. Aregbesola, P. Donkor, F.K.N. Arthur, S.A. Bello, A. Martinez, M. Li, E.A. Augustine-Akpan, W. Deressa, P. Twumasi, J. Olutayo, M. Deribew, P. Agbenorku, A.A. Oti, R. Braimah, G. Plange-Rhule, M. Gesses, S. Obiri-Yeboah, G.O. Oseni, P.B. Olaitan, L. Abdur-Rahman, F. Abate, T. Hailu, P. Gravem, M.O. Ogunlewe, C.J. Buxó, M.L. Marazita, A.A. Adeyemo, J.C. Murray, A. Butali

**Appendix Table 5:** Other rare and/or potentially aetiologic variants observed in seven sequenced genes

| HGVS            | HGVp         | $\alpha$ | $\uparrow$                | b        | Polyphen-2        | SIFT        | $\S$               | $\text{¥}$ | Reference  |
|-----------------|--------------|----------|---------------------------|----------|-------------------|-------------|--------------------|------------|------------|
| <b>ARHGAP29</b> |              |          |                           |          |                   |             |                    |            |            |
| c.560-199T>C    | N/A          | 1        | NSCLP                     | N/A      | N/A               | N/A         | $\beta$            | N/A        | dbSNP      |
| c.1144-18T>C    | N/A          | 2        | 1 NSCLP and 1 NSCL        | N/A      | N/A               | N/A         | $\beta, \mu$       | N/A        | dbSNP      |
| c.2738C>T       | p.Ser913Leu  | 4        | 2 NSCLP, 1 NSCL and 1 CPO | 4 d      | Benign            | Deleterious | N/A                | N/A        | dbSNP      |
| c.2957T>C       | p.Ile986Thr  | 1        | NSCLP                     | N/A      | Benign            | Tolerated   | N/A                | N/A        | dbSNP      |
| c.2962G>T       | p.Asp988Tyr  | 2        | NSCLP                     | 1 d, 1 g | Probably Damaging | Deleterious | N/A                | N/A        | dbSNP      |
| c.3023G>A       | p.Arg1008Lys | 2        | 1 NSCLP and 1 CPO         | N/A      | Benign            | Tolerated   | N/A                | N/A        | dbSNP      |
| <b>VAX1</b>     |              |          |                           |          |                   |             |                    |            |            |
| c.390G>A        | p.Arg130Arg  | 1        | NSCPO                     | N/A      | Benign            | Tolerated   | $\epsilon$         | N/A        | Novel      |
| c.429+37G>C     | N/A          | 1        | NSCLP                     | N/A      | N/A               | N/A         | $\beta$            | N/A        | 1000Genome |
| c.429+50C>A     | N/A          | 4        | 1 NSCLP, 1 NSCL and 2 CPO | N/A      | N/A               | N/A         | $\mu$              | $\lambda$  | 1000Genome |
| c.693C>A        | p.Ala231Ala  | 4        | 1 NSCLP and 3 NSCPO       | N/A      | Benign            | Tolerated   | $\gamma, \epsilon$ | $\lambda$  | Novel      |
| c.754G>T        | p.Gly252Cys  | 1        | NSCL                      | e        | Probably          | Deleterious | N/A                | N/A        | Novel      |

|              |             |   |                    |          |                   |                          |      |     |                |
|--------------|-------------|---|--------------------|----------|-------------------|--------------------------|------|-----|----------------|
|              |             |   |                    |          | Damaging          |                          |      |     |                |
| <b>PAX7</b>  |             |   |                    |          |                   |                          |      |     |                |
| c.703G>A     | p.Ala235Thr | 2 | NSCLP              | 1 c, 1 d | Probably Damaging | Deleterious              | N/A  | N/A | dbSNP and ExAC |
| c.1223C>T    | p.Pro408Leu | 1 | CPO                | d        | Probably Damaging | Deleterious              | N/A  | N/A | dbSNP and ExAC |
| <b>MSX1</b>  |             |   |                    |          |                   |                          |      |     |                |
| c.95C>T      | p.Ala32Val  | 4 | 2 NSCL and 2 CPO   | N/A      | Benign            | Tolerated                | η,ε  | N/A | ExAc           |
| c.218C>T     | p.Pro73Leu  | 3 | NSCL               | 2 d, 1 f | Possibly Damaging | Deleterious              | N/A  | N/A | dbSNP          |
| c.522G>A     | p.Lys174Lys | 1 | NSCL               | N/A      | Benign            | Tolerated                | N/A  | N/A | Novel          |
| <b>BMP4</b>  |             |   |                    |          |                   |                          |      |     |                |
| c.860G>A     | p.Arg287His | 1 | NSCL               | N/A      | Benign            | Tolerated                | N/A  | N/A | dbSNP          |
| c.371-164G>A | N/A         | 2 | 1 NSCLP and 1 NSCL | N/A      | N/A               | N/A                      | β, μ | N/A | Novel          |
| c.280G>A     | p.Glu94Lys  | 1 | NSCL               | N/A      | Benign            | Tolerated                | N/A  | N/A | Novel          |
| c.228T>A     | p.Ser76Arg  | 3 | 2 NSCLP and 1 NSCL | 1 d, 2 f | Possibly Damaging | Damaging to two isoforms | N/A  | N/A | dbSNP          |
| <b>FOXE1</b> |             |   |                    |          |                   |                          |      |     |                |

|             |             |   |                           |                    |                   |             |     |     |       |
|-------------|-------------|---|---------------------------|--------------------|-------------------|-------------|-----|-----|-------|
| c.107C>T    | p.Thr36Met  | 1 | NSCLP                     | d                  | Possibly Damaging | Deleterious | N/A | N/A | ExAc  |
| c.569C>G    | p.Pro190Arg | 6 | 3 NSCLP, 2 NSCL and 1 CPO | 1 c, 2 d, 1 e, 2 f | Possibly Damaging | Deleterious | N/A | N/A | dbSNP |
| <b>MAFB</b> |             |   |                           |                    |                   |             |     |     |       |
| c.-1G>A     | N/A         | 2 | 1 NSCL and 1 CPO          | N/A                | N/A               | N/A         | δ   | N/A | dbSNP |
| c.-75C>A    | N/A         | 1 | NSCLP                     | N/A                | N/A               | N/A         | N/A | λ   | dbSNP |
| c.603G>C    | p.Ala201Ala | 1 | NSCL                      | N/A                | Benign            | Tolerated   | N/A | N/A | Novel |

α: Total number of cases with variant, ¶: subphenotype of probands in which the variant was observed, b: segregation analyses, c: variant was observed in clinically unaffected father, d: variant was observed in clinically unaffected mother, e: variant was absent in the only paternal sample available, f: variant was absent in the only maternal sample available, g: no parental sample was available, §: Human Splice Finder, ¥: RegulomeDB, β: alteration of Exonic Splicing Silencer (ESS) Site, μ: creation of new Exonic Splicing Enhancer (ESE) site, δ: Alteration of the wildtype (WT) donor site, ε: alteration of an ESE site, γ: creation of new Acceptor site with branch points, η: creation of new Donor site, λ: 2b - Likely to affect binding of *EZH2*, N/A: Not Applicable, NSCLP: nonsyndromic cleft lip and palate, NSCL: nonsyndromic cleft lip only, CPO: cleft palate only. All analyses were based on genome assembly number GRCh37/hg19, 2009 (<http://genome.ucsc.edu>).
